# Supplementary material for: TiO2/PDA Multilayer Nanocomposites with Exceptionally Sharp Large-Scale Interfaces and Nitrogen Doping Gradient
Source: PubMed Central journal article supplement (PMC10910457; doi:10.1021/acsami.3c18935), 2024-02-13
Supplement: am3c18935_si_001.pdf [file am3c18935_si_001.pdf]

## Supporting Information

# TiO<sub>2</sub>/polydopamine multilayer nanocomposite with exceptionally sharp large-scale interfaces and nitrogen doping gradient

Jakub Szewczyk\*<sup>1,2</sup>, Igor Iatsunskiy<sup>1</sup>, Paweł Piotr Michałowski<sup>3</sup>, Karol Załęski<sup>1</sup>, Cassandre Lamboux<sup>2</sup>, Syreina Sayegh<sup>2</sup>, Elissa Makhoul<sup>2</sup>, Andreu Cabot<sup>4,5</sup>, Xingqi Chang<sup>4</sup>, Mikhael Bechelany<sup>2,6</sup>, Emerson Coy<sup>1\*</sup>

<sup>1</sup> NanoBioMedical Centre, Adam Mickiewicz University, Wszechnicy Piastowskiej 3, 61-614, Poznan, Poland.

<sup>2</sup> Institut Européen des Membranes, IEM, UMR 5635, Univ Montpellier, CNRS, ENSCM Place Eugène Bataillon, 34095 Montpellier cedex 5, France

<sup>3</sup> Łukasiewicz Research Network - Institute of Microelectronics and Photonics, Aleja Lotników 32/46, 02-668 Warsaw, Poland

<sup>4</sup> Advanced Materials Department, Catalonia Institute for Energy Research (IREC), Sant Adrià de Besòs, 08930, Barcelona, Spain

<sup>5</sup> ICREA, Pg. Lluís Companys 23, 08010 Barcelona, Spain

<sup>6</sup> Gulf University for Science and Technology, GUST, Kuwait

\* Corresponding authors: [jaksze3@amu.edu.pl](mailto:jaksze3@amu.edu.pl), [coyeme@amu.edu.pl](mailto:coyeme@amu.edu.pl)

## Table of contents

|                  |                                                                                                                      |     |
|------------------|----------------------------------------------------------------------------------------------------------------------|-----|
| <b>Table S1</b>  | XPS Atomic percentage and binding energies of the elements for etching times 0, 3, 21, 36 and 53 min.                | S2  |
| <b>Table S2</b>  | XPS Area percentage, FWHM and binding energies of high resolution regions for etching times 0, 3, 21, 36 and 53 min. | S3  |
| <b>Figure S1</b> | XPS Full spectra and High-Resolution Spectra for etching time 0 min                                                  | S4  |
| <b>Figure S2</b> | XPS Full spectra and High-Resolution Spectra for etching time 3 min                                                  | S5  |
| <b>Figure S3</b> | XPS Full spectra and High-Resolution Spectra for etching time 21 min                                                 | S6  |
| <b>Figure S4</b> | XPS Full spectra and High-Resolution Spectra for etching time 36 min                                                 | S7  |
| <b>Figure S5</b> | XPS Full spectra and High-Resolution Spectra for etching time 53 min                                                 | S8  |
| <b>Figure S6</b> | The real part of the refractive index and the extinction coefficient for the PDA                                     | S9  |
| <b>Figure S7</b> | Open Circuit Photopotential (a), Open Circuit Photocurrent (b) curves for 3-layer nanocomposite.                     | S10 |

## Supporting Information

**Table S1.** X-Ray photoelectron spectroscopy deep profiles, Atomic percentage and binding energies of the elements for etching times 0, 3, 21, 36 and 53 min.

| Etching time (min) | Element | Binding Energy (eV) | Atomic % |
|--------------------|---------|---------------------|----------|
| 0                  | Ti      | 458.83              | 0.3      |
|                    | C       | 284.83              | 70.1     |
|                    | N       | 400.13              | 6.6      |
|                    | O       | 532.98              | 21.0     |
|                    | Si      | 101.93              | 1.0      |
| 3                  | Ti      | 459.41              | 0.9      |
|                    | C       | 284.71              | 89.0     |
|                    | N       | 399.21              | 5.6      |
|                    | O       | 531.11              | 3.8      |
|                    | Si      | -                   | -        |
| 21                 | Ti      | 459.28              | 4.5      |
|                    | C       | 284.73              | 80.4     |
|                    | N       | 398.98              | 3.6      |
|                    | O       | 531.18              | 11.6     |
|                    | Si      | -                   | -        |
| 37                 | Ti      | 460.67              | 22.6     |
|                    | C       | 286.07              | 25.5     |
|                    | N       | 398.27              | 2.4      |
|                    | O       | 532.42              | 45.5     |
|                    | Si      | 103.77              | 2.6      |
| 53                 | Ti      | 460.09              | 28.7     |
|                    | C       | 286.89              | 9.9      |
|                    | N       | 399.19              | 1.9      |
|                    | O       | 533.09              | 59.6     |
|                    | Si      | -                   | -        |

## Supporting Information

**Table S2.** X-ray photoelectron spectroscopy deep profiles- area percentage, binding energies and FWHM values for C 1s, O 1s regions for etching times 0, 3, 21, 36 and 53 min. Additionally, the N 1s region for times 0 and 3 min was shown (not shown in Table 1)

| Etching time (min) | High resolution region | Binding Energy (eV) | FWHM | Area % |
|--------------------|------------------------|---------------------|------|--------|
| 0                  | C 1s                   | 290.19              | 3.85 | 2.7    |
|                    |                        | 288.31              | 1.81 | 7.0    |
|                    |                        | 286.18              | 1.64 | 43.9   |
|                    |                        | 285.21              | 0.76 | 7.3    |
|                    |                        | 284.68              | 1.08 | 39.1   |
|                    | N 1s                   | 401.81              | 2.32 | 25.5   |
|                    |                        | 400.09              | 1.85 | 73.0   |
|                    |                        | 398.67              | 0.79 | 1.53   |
|                    | O 1s                   | 533.02              | 1.78 | 69.8   |
|                    |                        | 531.49              | 1.88 | 30.2   |
| 3                  | C 1s                   | 289.88              | 1.71 | 0.7    |
|                    |                        | 287.95              | 2.49 | 4.5    |
|                    |                        | 285.79              | 2.16 | 26.8   |
|                    |                        | 285.10              | 1.47 | 40.1   |
|                    |                        | 284.59              | 1.01 | 28.0   |
|                    | N 1s                   | 402.31              | 1.86 | 4.8    |
|                    |                        | 400.38              | 1.57 | 33.2   |
|                    |                        | 398.95              | 1.71 | 62.1   |
|                    | O 1s                   | 532.66              | 2.44 | 50.6   |
|                    |                        | 531.04              | 1.34 | 49.4   |
| 21                 | C 1s                   | 290.59              | 2.07 | 1.6    |
|                    |                        | 288.51              | 2.25 | 4.1    |
|                    |                        | 286.25              | 2.49 | 20.6   |
|                    |                        | 285.16              | 1.67 | 44.8   |
|                    |                        | 284.63              | 1.02 | 29.0   |
|                    | O 1s                   | 532.50              | 2.49 | 39.0   |
| 531.15             |                        | 1.38                | 61.0 |        |
| 36                 | C 1s                   | 288.72              | 1.87 | 3.5    |
|                    |                        | 287.22              | 1.62 | 18.5   |
|                    |                        | 286.03              | 1.42 | 64.8   |
|                    |                        | 284.62              | 1.25 | 13.1   |
|                    | O 1s                   | 533.19              | 1.89 | 37.7   |
| 532.32             |                        | 1.19                | 62.3 |        |
| 53                 | C 1s                   | 288.33              | 1.77 | 13.4   |
|                    |                        | 286.90              | 1.63 | 61.0   |
|                    |                        | 284.80              | 1.16 | 25.6   |
|                    | O 1s                   | 534.06              | 2.08 | 36.8   |
|                    |                        | 533.09              | 1.23 | 63.2   |

## Supporting Information

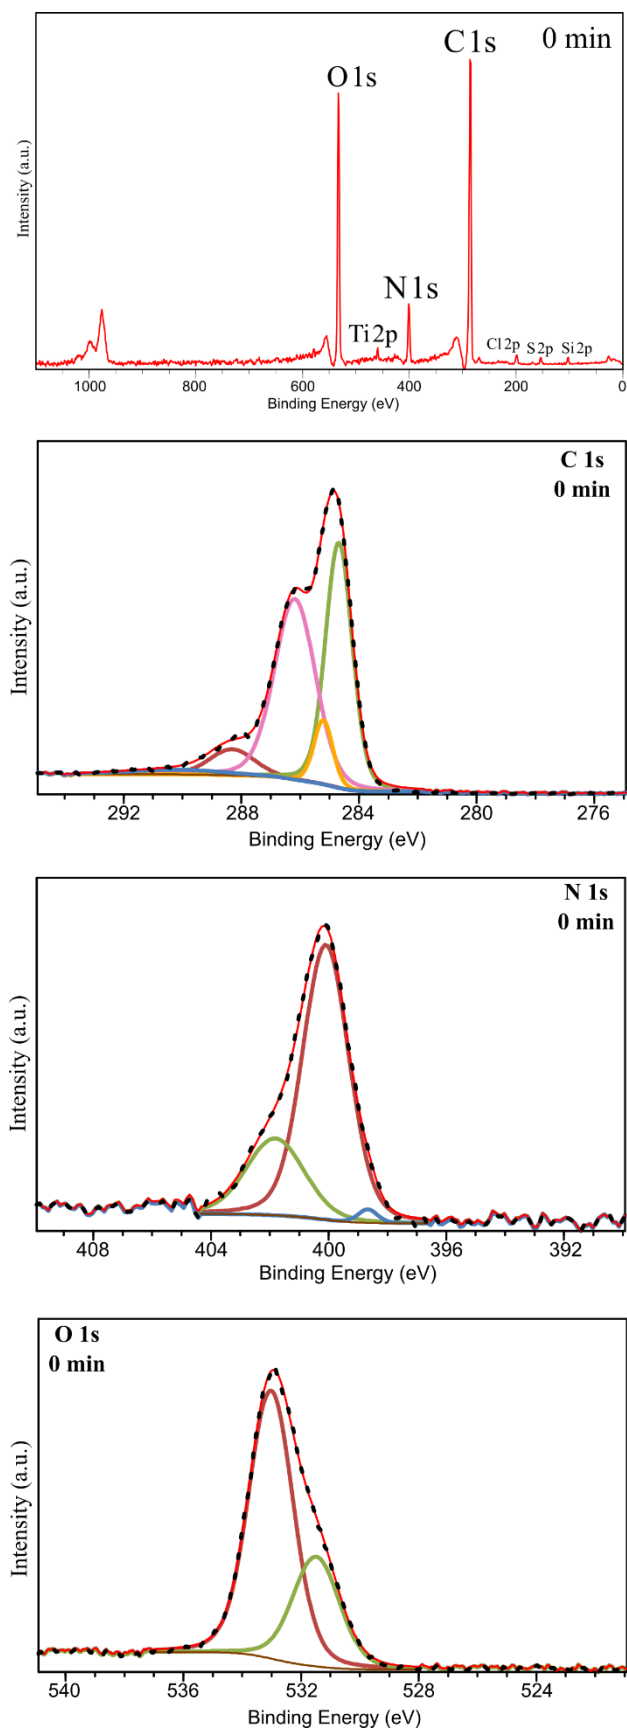

**Figure S1.** X-ray Photoelectron Full spectra and High-Resolution Spectra of the C 1s, N 1s and O 1s regions for etching time 0 min.

## Supporting Information

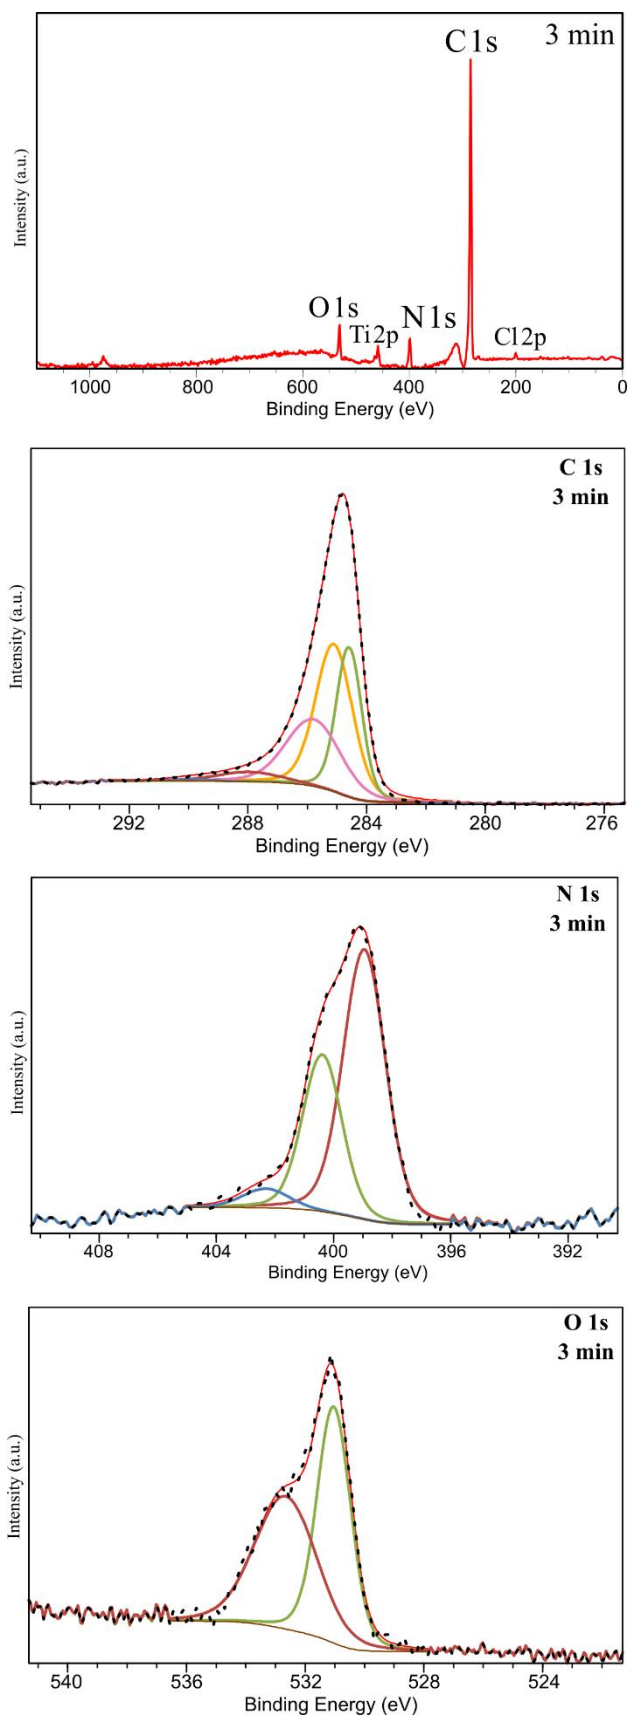

**Figure S2.** X-ray Photoelectron Full spectra and High-Resolution Spectra of the C 1s, N 1s and O 1s regions for etching time 3 min.

## Supporting Information

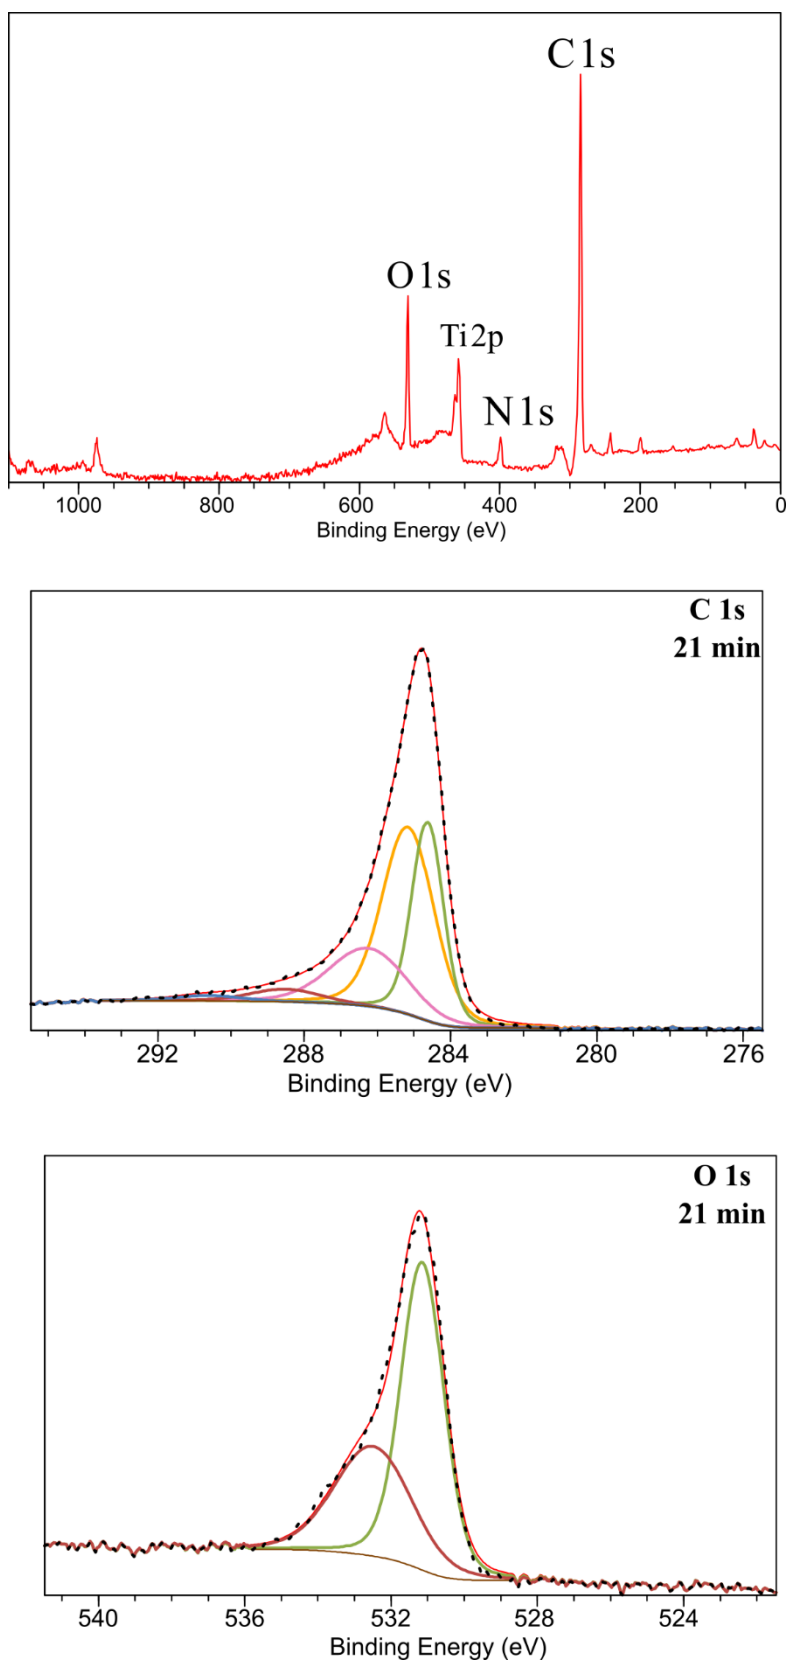

**Figure S3.** X-ray Photoelectron Full spectra and High-Resolution Spectra of the C 1s and O 1s regions for etching time 21 min.

## Supporting Information

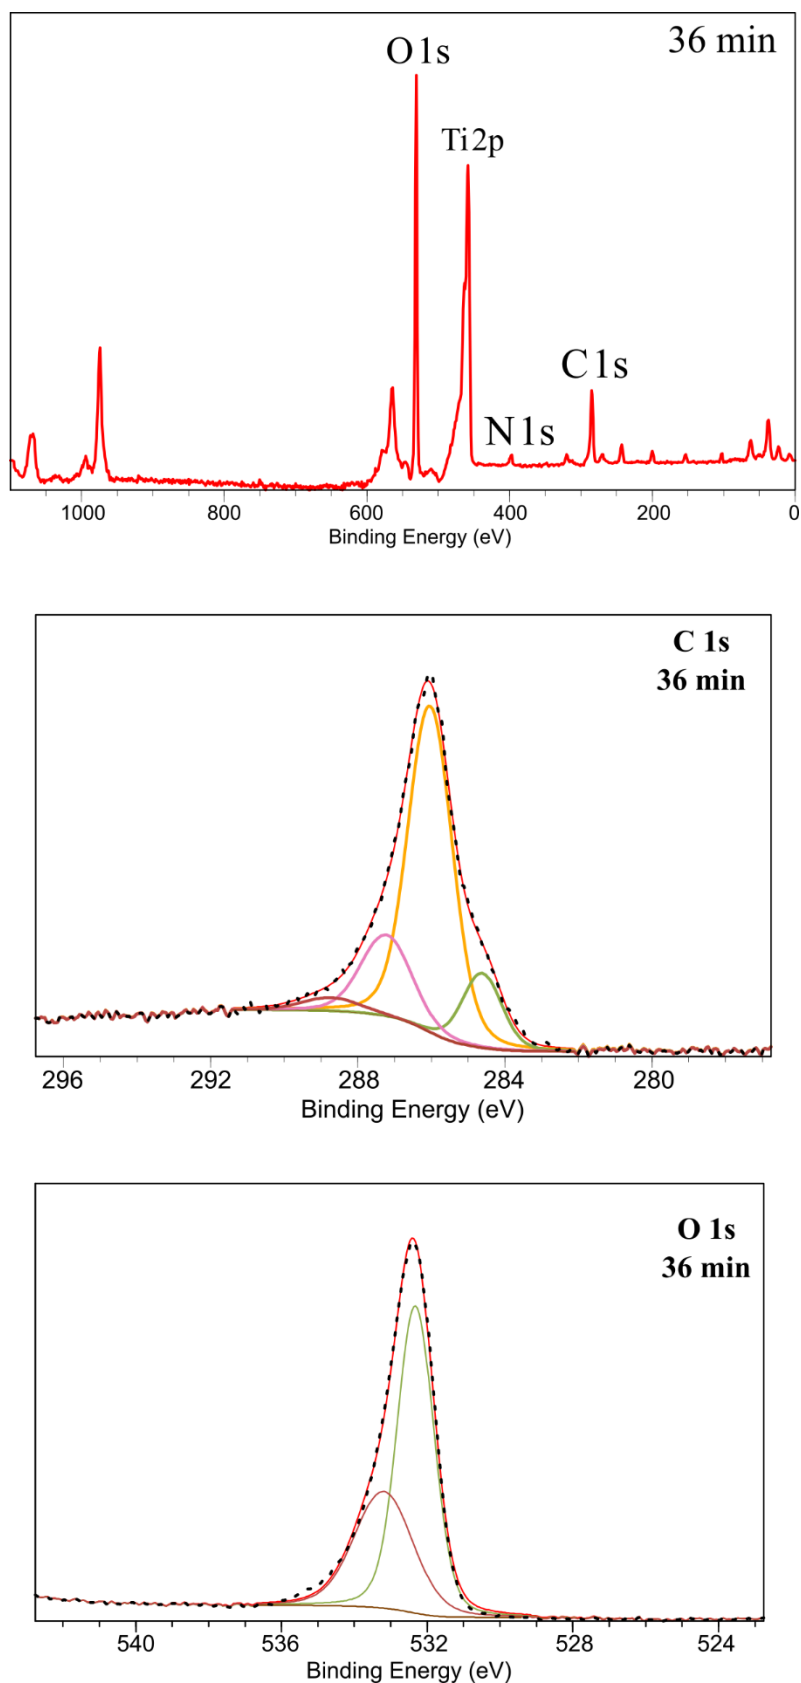

**Figure S4.** X-ray Photoelectron Full spectra and High-Resolution Spectra of the C 1s and O 1s regions for etching time 36 min.

## Supporting Information

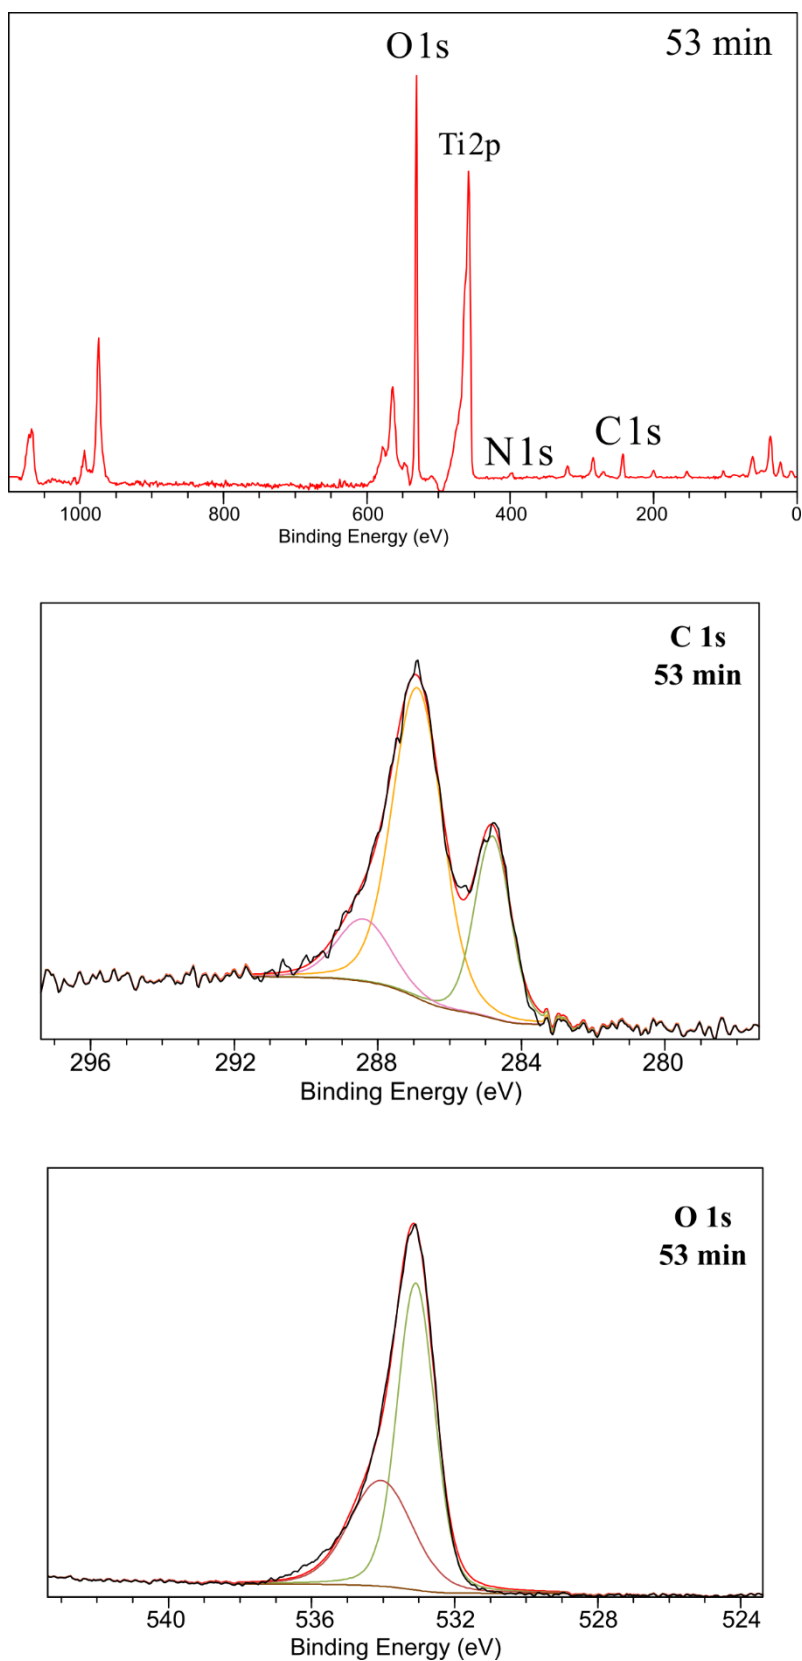

**Figure S5.** X-ray Photoelectron Full spectra and High-Resolution Spectra of the C 1s and O 1s regions for etching time 53 min.



## Supporting Information

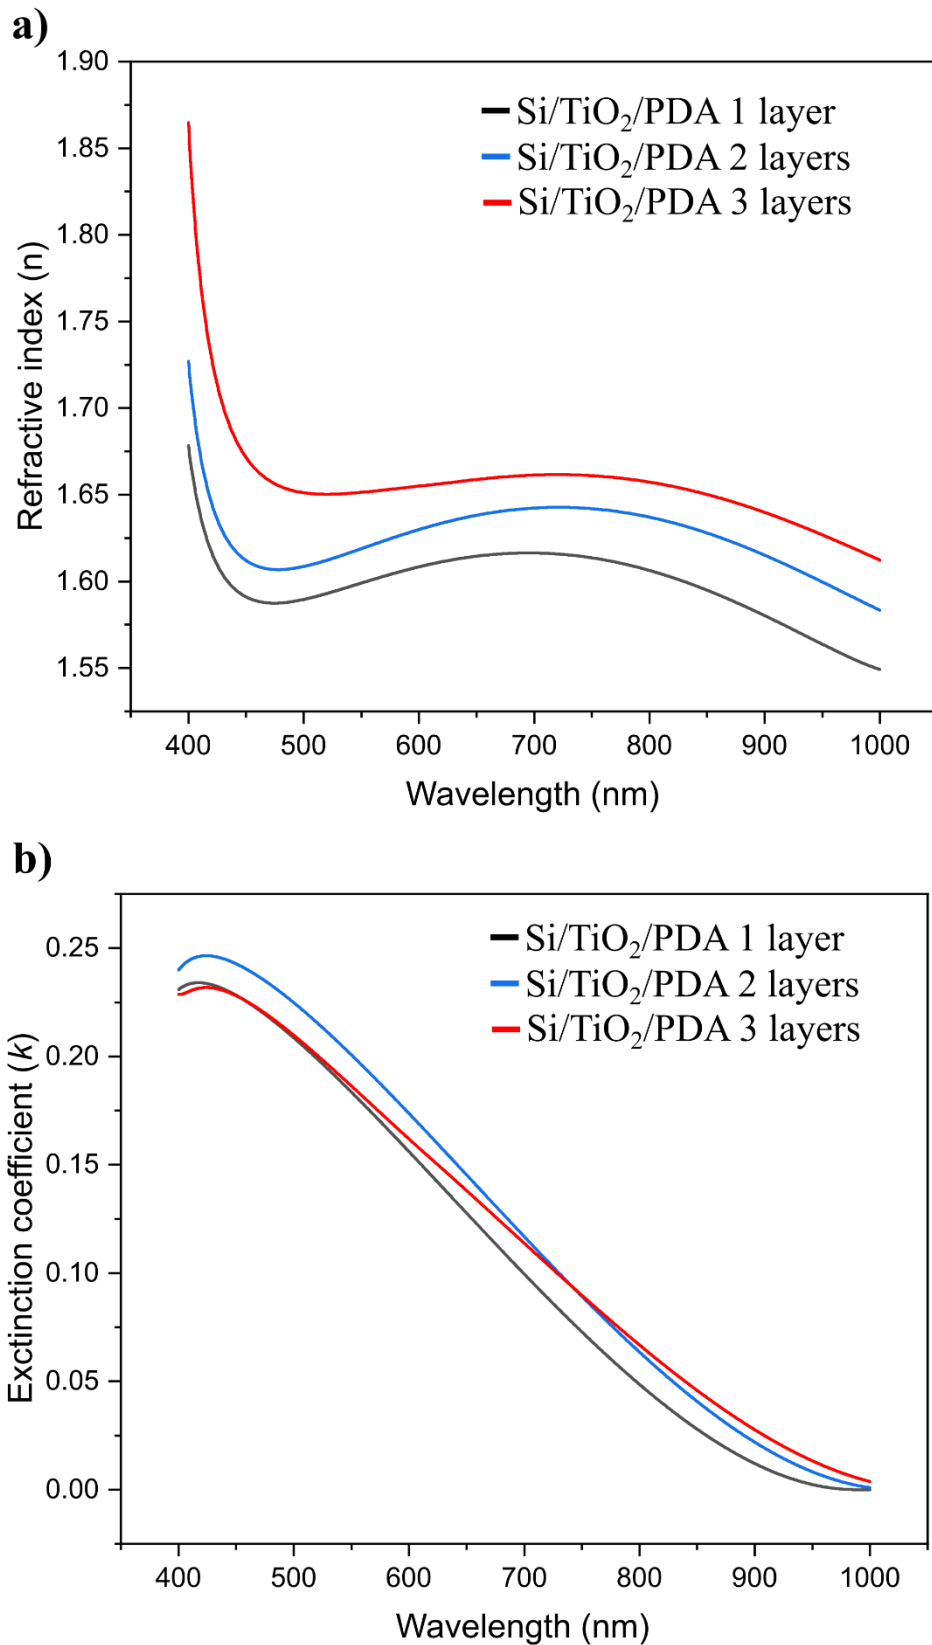

**Figure S6.** The real part of the refractive index (a), the extinction coefficient (b) for the PDA layers measured with ellipsometry.

## Supporting Information

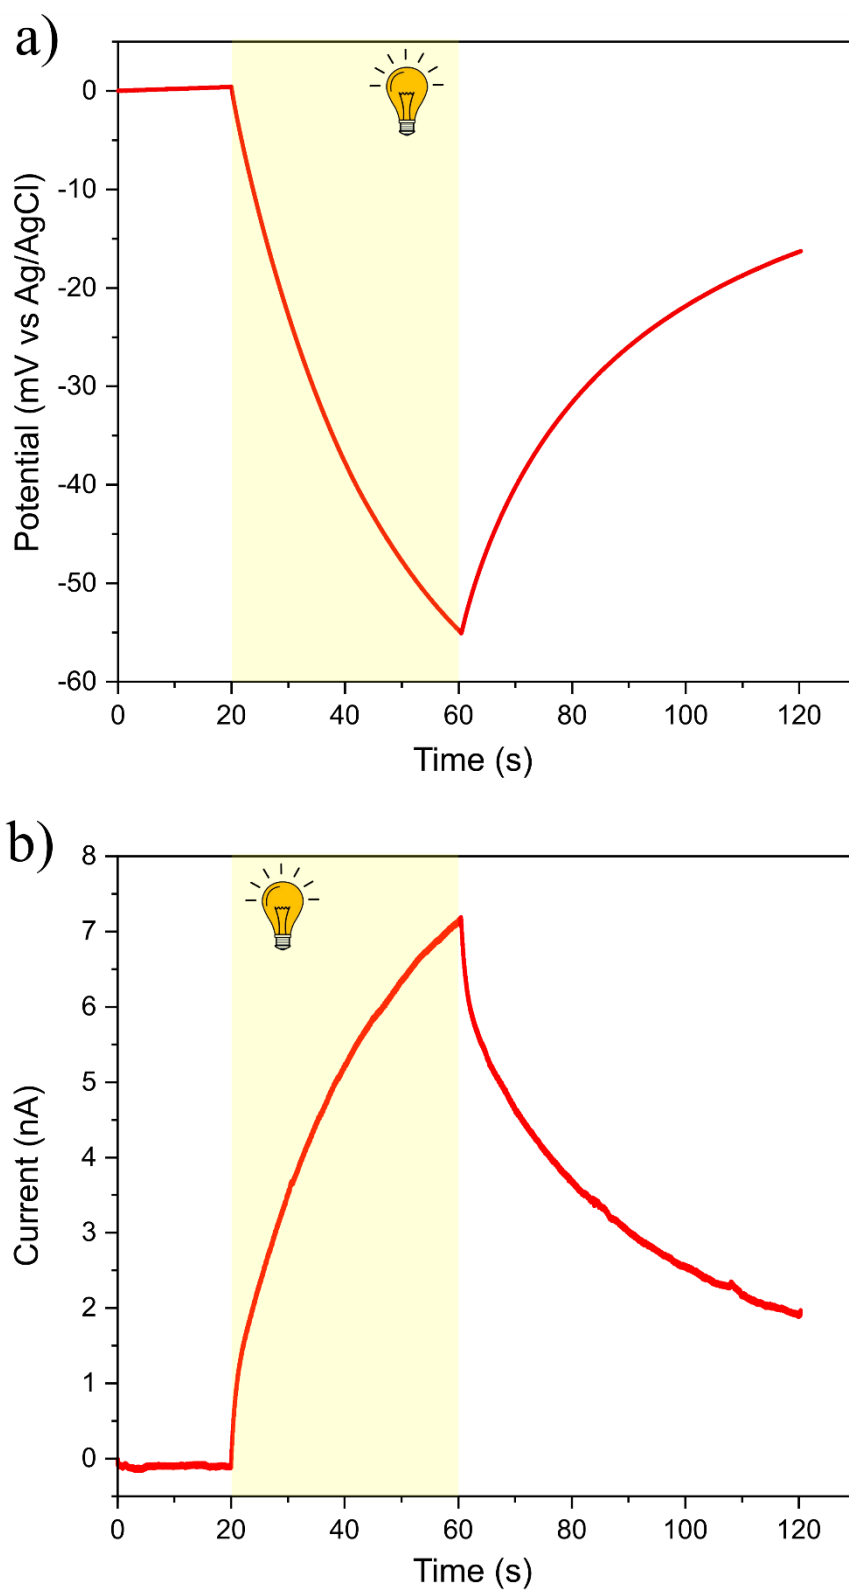

**Figure S7.** Open Circuit Photopotential (a), Open Circuit Photocurrent (b) curves for 3-layer nanocomposite.
